# Supplementary material
Source: PubMed Central journal article supplement (PMC1413878)
Supplement: pnas_0507825103_1.pdf [file pnas_0507825103_1.pdf]

*Rev-Erba* $\Sigma=0.058\pm 0.039$ , N=5food ZT00-ZT24  
without wheel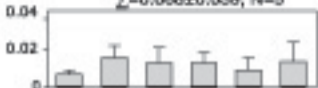 $\Sigma=0.077\pm 0.020$ , N=2food ZT00-ZT24  
with wheel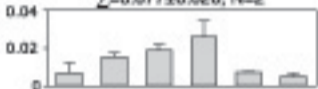 $\Sigma=0.079\pm 0.025$ , N=2food ZT12-ZT04  
without wheel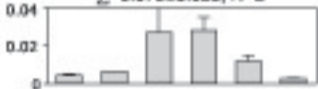 $\Sigma=0.070\pm 0.029$ , N=4food ZT12-ZT04  
with wheel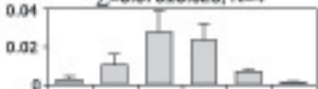

ZT 0 4 8 12 16 20

*Bmal1* $\Sigma=0.066\pm 0.029$ , N=5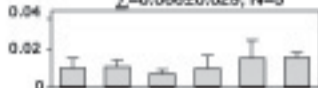 $\Sigma=0.103\pm 0.013$ , N=2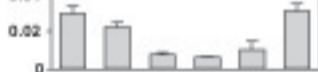 $\Sigma=0.052\pm 0.025$ , N=2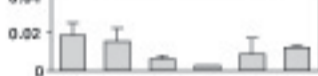 $\Sigma=0.056\pm 0.024$ , N=4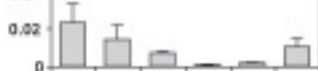

ZT 0 4 8 12 16 20
